# Supplementary material for: Targeting BRPF3 moderately reverses olaparib resistance in high grade serous ovarian carcinoma
Source: bioRxiv or medRxiv preprint supplement (doi:10.1101/2021.12.21.473688), 2022-11-07
Supplement: Supplementary file [file media-1.pdf]

## Supplemental Figures

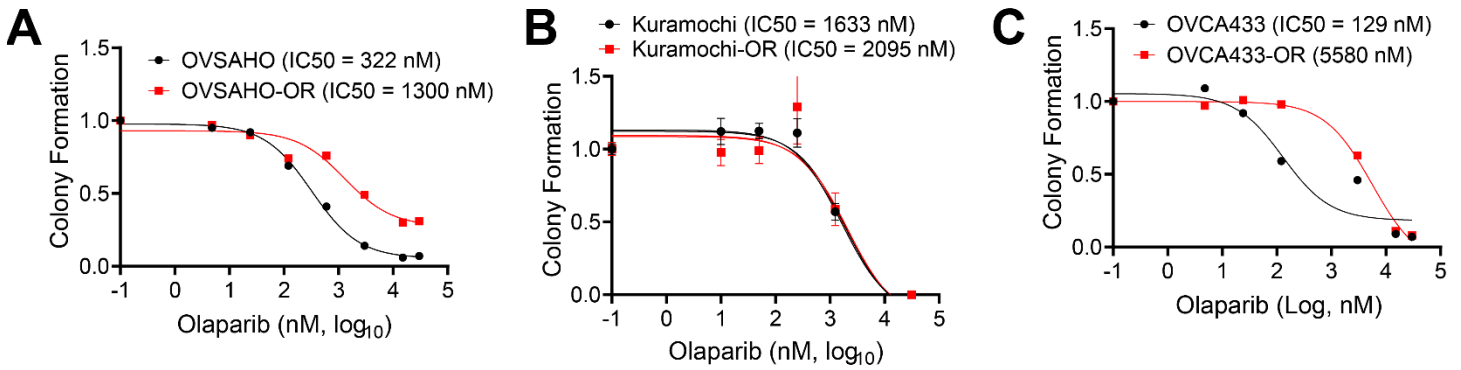

**Fig. S1. HGSOC cell lines selected in olaparib exhibit increased olaparib IC<sub>50</sub> relative to isogenic parental lines. (A-C)** The indicated HGSOC cell lines (OVSAHO, Kuramochi, and OVCA433) were subjected to stepwise dose escalation of olaparib to select for resistant cells. Elevated olaparib IC<sub>50</sub> was confirmed in olaparib-resistant (-OR) lines by dose response colony formation assays. The proportion of colonies at each dose are shown relative to vehicle control. Olaparib IC<sub>50</sub> values were calculated in GraphPad Prism.

### Stage

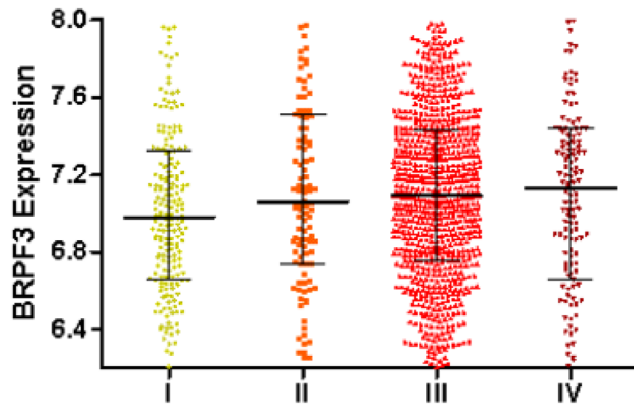

| Mann Whitney Test | I | II       | III      | IV       | Rest     |
|-------------------|---|----------|----------|----------|----------|
| I                 |   | 1.13e-01 | 9.70e-03 | 1.24e-01 | 1.65e-02 |
| II                |   |          | 9.50e-01 | 7.95e-01 | 6.39e-01 |
| III               |   |          |          | 8.57e-01 | 1.40e-01 |
| IV                |   |          |          |          | 8.10e-01 |

| Description\Stage | I     | II    | III   | IV    |
|-------------------|-------|-------|-------|-------|
| Mean              | 7.016 | 7.123 | 7.100 | 7.078 |
| Quantile 1        | 6.656 | 6.742 | 6.757 | 6.667 |
| Median            | 6.981 | 7.062 | 7.090 | 7.128 |
| Quantile 4        | 7.324 | 7.513 | 7.436 | 7.440 |

### Grade

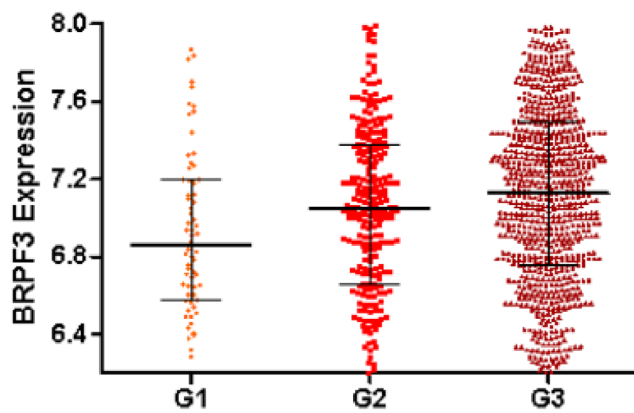

| Mann Whitney Test | Grade 1 | Grade 2  | Grade 3  | Rest     |
|-------------------|---------|----------|----------|----------|
| Grade 1           |         | 5.07e-02 | 7.20e-04 | 3.76e-03 |
| Grade 2           |         |          | 1.13e-02 | 1.45e-01 |
| Grade 3           |         |          |          | 5.62e-04 |

| Description\Grade | Grade 1 | Grade 2 | Grade 3 |
|-------------------|---------|---------|---------|
| Mean              | 6.942   | 7.021   | 7.134   |
| Quantile 1        | 6.576   | 6.662   | 6.754   |
| Median            | 6.861   | 7.048   | 7.130   |
| Quantile 4        | 7.196   | 7.375   | 7.493   |

**Fig. S2. BRPF3 expression is positively correlated with higher HGSOC stage and grade. A meta-analysis of HGSOC microarray data was performed using CSIOVDB.**

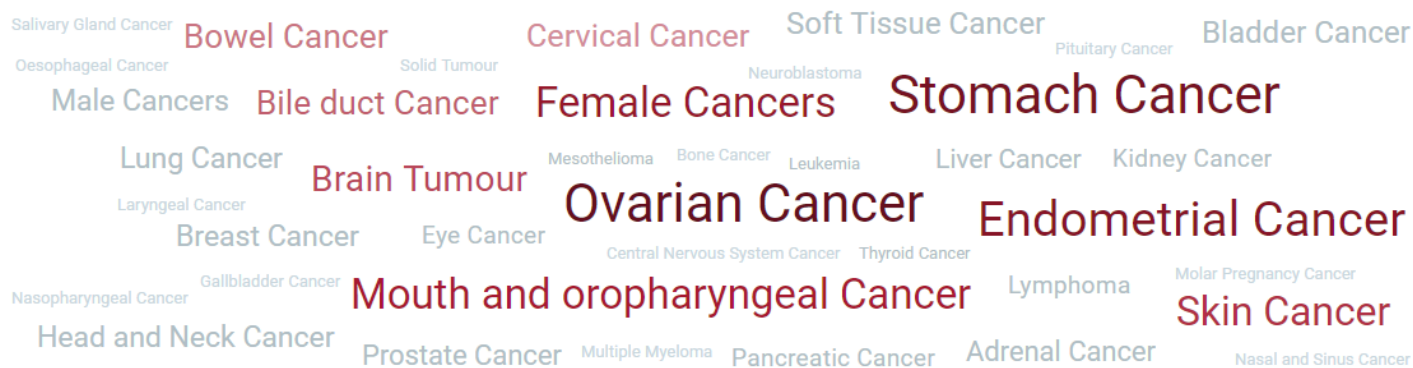

**Fig. S3. BRPF3 is significantly associate with ovarian cancer in combined molecular score.** Word cloud generated by canSAR Black by meta-analysis of cancer datasets. Combined molecular score includes mutation score, gene expression, and copy number variation.



## Supplemental Tables

| Gene<br>(Protein)       | TPM<br>(834 Ctrl) | TPM<br>(846 Ctrl) | TPM<br>(827 Olap) | TPM<br>(878 Olap) | logFC  | P-value  | FDR   |
|-------------------------|-------------------|-------------------|-------------------|-------------------|--------|----------|-------|
| <i>KAT2A</i><br>(GCN5)  | 6.35              | 5.98              | 15.09             | 13.61             | 1.093  | 5.11E-05 | 0.003 |
| <i>KAT2B</i><br>(PCAF)  | 4.92              | 3.93              | 3.63              | 4.62              | -0.149 | 0.593    | 1.000 |
| <i>KAT3A</i><br>(CBP)   | 8.66              | 10.12             | 13.46             | 13.13             | 0.532  | 0.041    | 0.363 |
| <i>KAT3B</i><br>(P300)  | 10.85             | 15.09             | 12.62             | 14.84             | 0.236  | 0.369    | 1.000 |
| <i>KAT7</i><br>(HBO1)   | 7.42              | 6.56              | 6.88              | 9.45              | 0.185  | 0.497    | 1.000 |
| <i>BRPF3</i><br>(BRPF3) | 5                 | 6.15              | 8.21              | 8.96              | 0.642  | 0.019    | 0.234 |

**Table S1. RNA-Seq analysis of PDX-GTFB1009 olaparib-treated and -untreated ascites.** For each of the indicated genes, the transcripts per million (TPM) are shown for the four indicated mice, as well as log fold change (logFC), P-value, and false discovery rate (FDR).

**Table S2. shRNA**

| shRNA     | The RNAi Consortium Number  | Target Sequence       |
|-----------|-----------------------------|-----------------------|
| shCTRL    | N/A (Sigma-Aldrich #SHC016) | N/A                   |
| shKAT2A#1 | TRCN0000038879              | GCTGAACTTTGTGCAGTACAA |
| shKAT2A#2 | TRCN0000286981              | GCTGAACTTTGTGCAGTACAA |
| shKAT2B#1 | TRCN0000018528              | GCAGACTTACAGCGAGTCTTT |
| shKAT2B#2 | TRCN0000364134              | CCTAAACCGCATCAACTATTG |
| shKAT3A#1 | TRCN0000356081              | ATCGCCACGTCCCTTAGTAAC |
| shKAT3A#2 | TRCN0000356082              | CGTTTACCATGAGATCCTTAT |
| shKAT3B#1 | TRCN0000231133              | TAACCAATGGTGGTGTATTA  |
| shKAT3B#2 | TRCN0000009883              | CAATTCCGAGACATCTTGAGA |
| shKAT7#1  | TRCN0000021630              | CGGGATAAGCAGATAGAAGAA |
| shKAT7#2  | TRCN0000021632              | CTCGTTCATCTGGTTCAGAAA |
| shBRPF3#1 | TRCN0000382105              | AGGAGGACTTTAACCTTATAG |
| shBRPF3#2 | TRCN0000277697              | TCACACTCTCTCCCGCTTATC |

**Table S3. RT-qPCR Primers**

| Name         | Sequence                | Usage                        |
|--------------|-------------------------|------------------------------|
| GAPDH_F      | GTCTCCTCTGACTTCAACAGCG  | Control ( $\Delta\Delta$ Ct) |
| GAPDH_R      | ACCACCCTGTTGCTGTAGCCAA  | Control ( $\Delta\Delta$ Ct) |
| KAT2A_GCN5_F | GCAGGTCAAGGGTTATGGGAC   | Gene expression              |
| KAT2A_GCN5_R | GCTCTTGGGCACCTTGATGT    | Gene expression              |
| KAT2B_PCAF_F | GGTGAAGAGCCATCAAAGCG    | Gene expression              |
| KAT2B_PCAF_R | GACTCGCTGTAAGTCTGCCA    | Gene expression              |
| KAT3A_CBP_F  | GGCCTTCAGGTTTTGTGTGC    | Gene expression              |
| KAT3A_CBP_R  | TTCCCAGTCTTGTGGTCTGC    | Gene expression              |
| KAT3B_P300_F | TGCCAAACCAGATGATGCCT    | Gene expression              |
| KAT3B_P300_R | ATAGCCCATAGGCGGGTTGA    | Gene expression              |
| KAT7_HBO1_F  | CACCAACGGAGAGACAGCTT    | Gene expression              |
| KAT7_HBO1_R  | GCAGCCTTAACTTCTCCAAATCC | Gene expression              |
| BRPF3_F      | CCCATCTGCAGTCCCAAAGA    | Gene expression              |
| BRPF3_R      | GGACTTTGACCTGCTCTCGTT   | Gene expression              |
